# Supplementary material for: Targeting Features of Curaxin CBL0137 on Hematological Malignancies In Vitro and In Vivo
Source: MDPI journal article supplement (doi:10.3390/biomedicines11010230), 2023-01-16
Supplement: s1 [file s1]

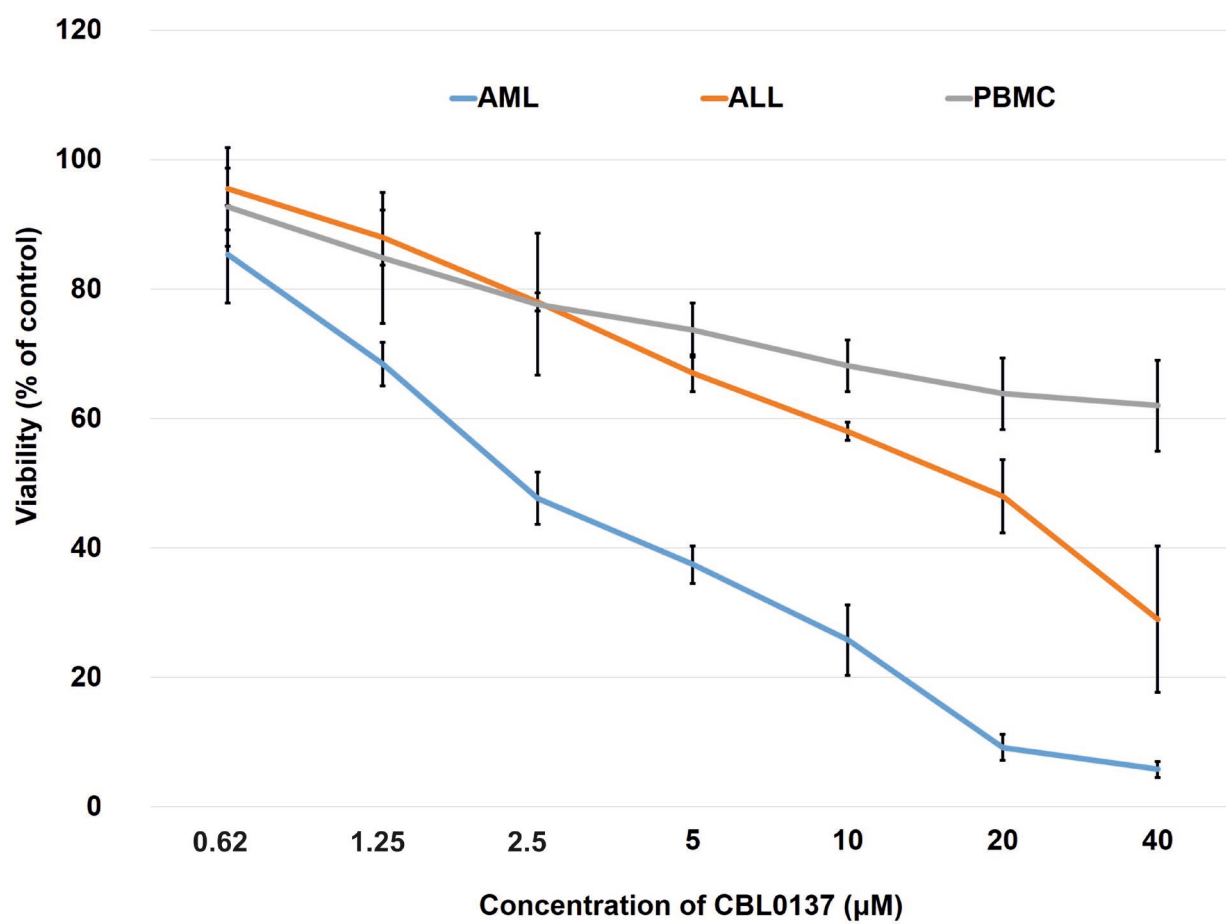

**Figure S1.** Comparison of the CBL0137's cytotoxic effect on PBMC, AML and ALL cells cultures

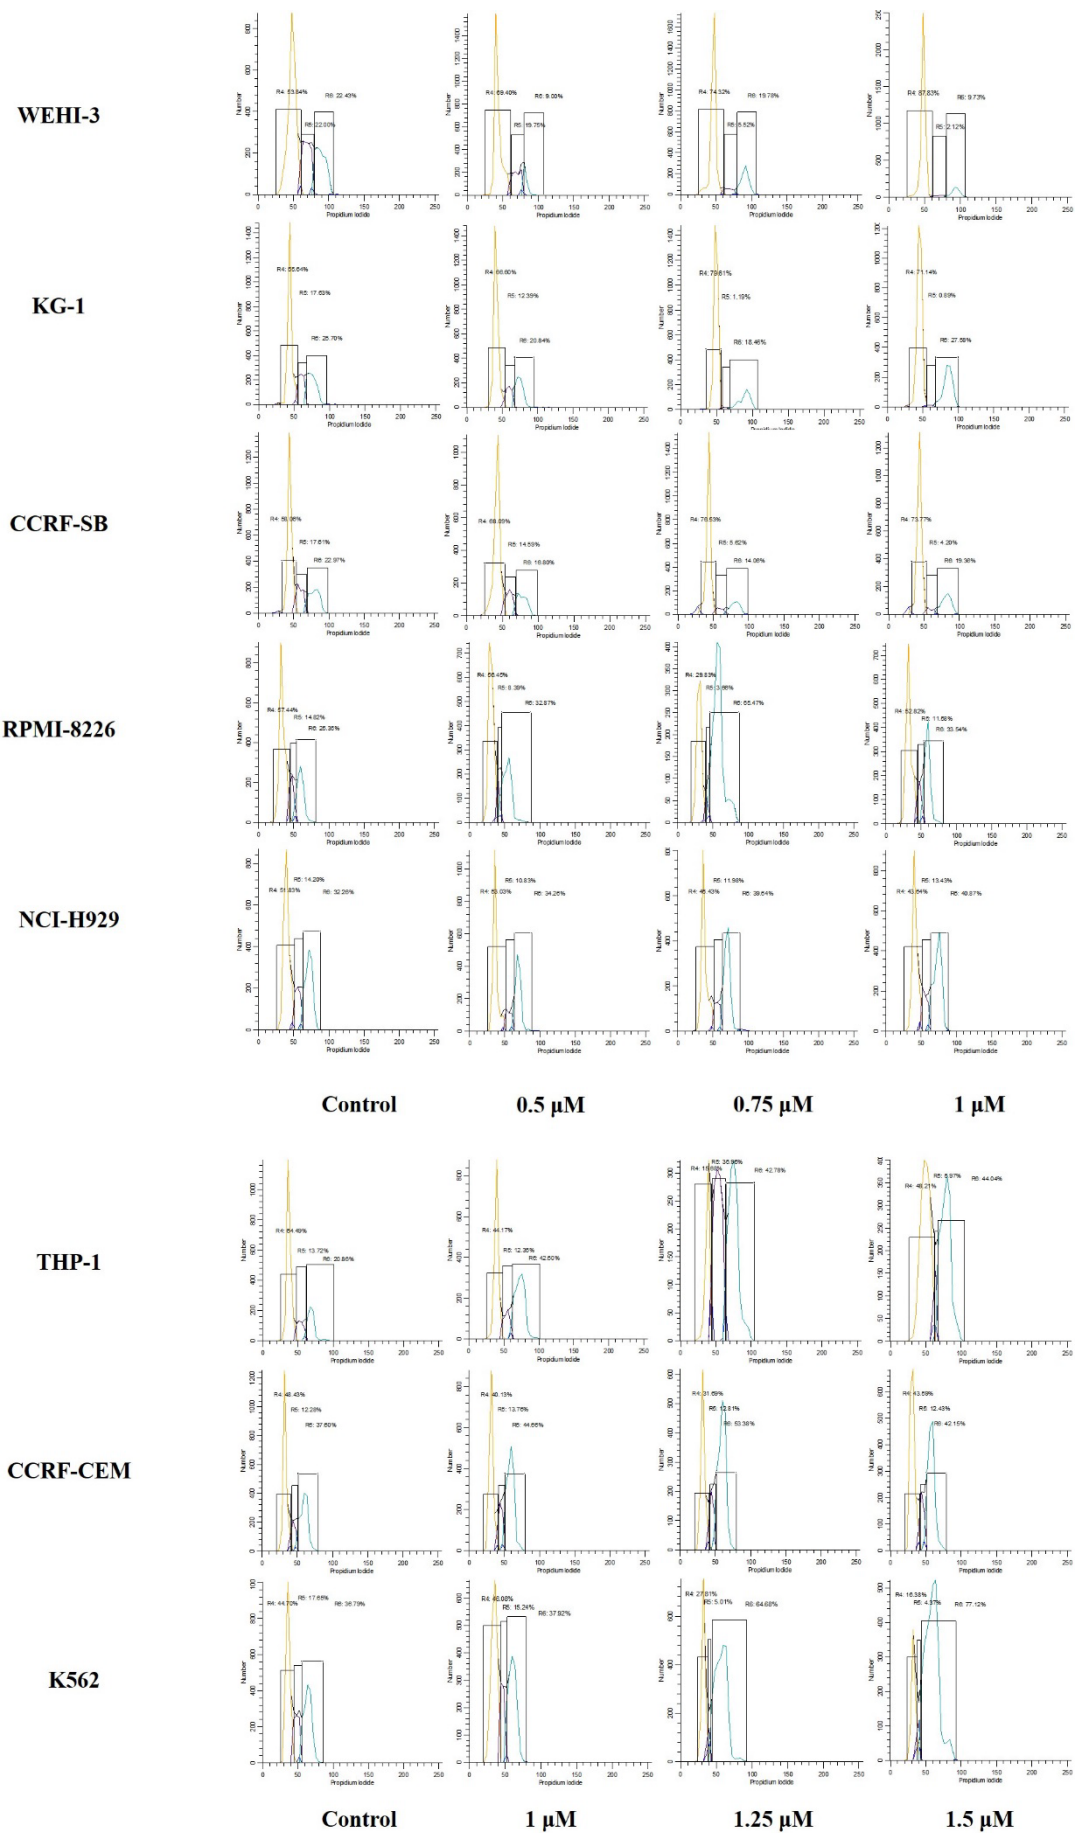

**Figure S2.** An example of the CBL0137's effect on the distribution of the cell cycle in hematologic malignancies cultures

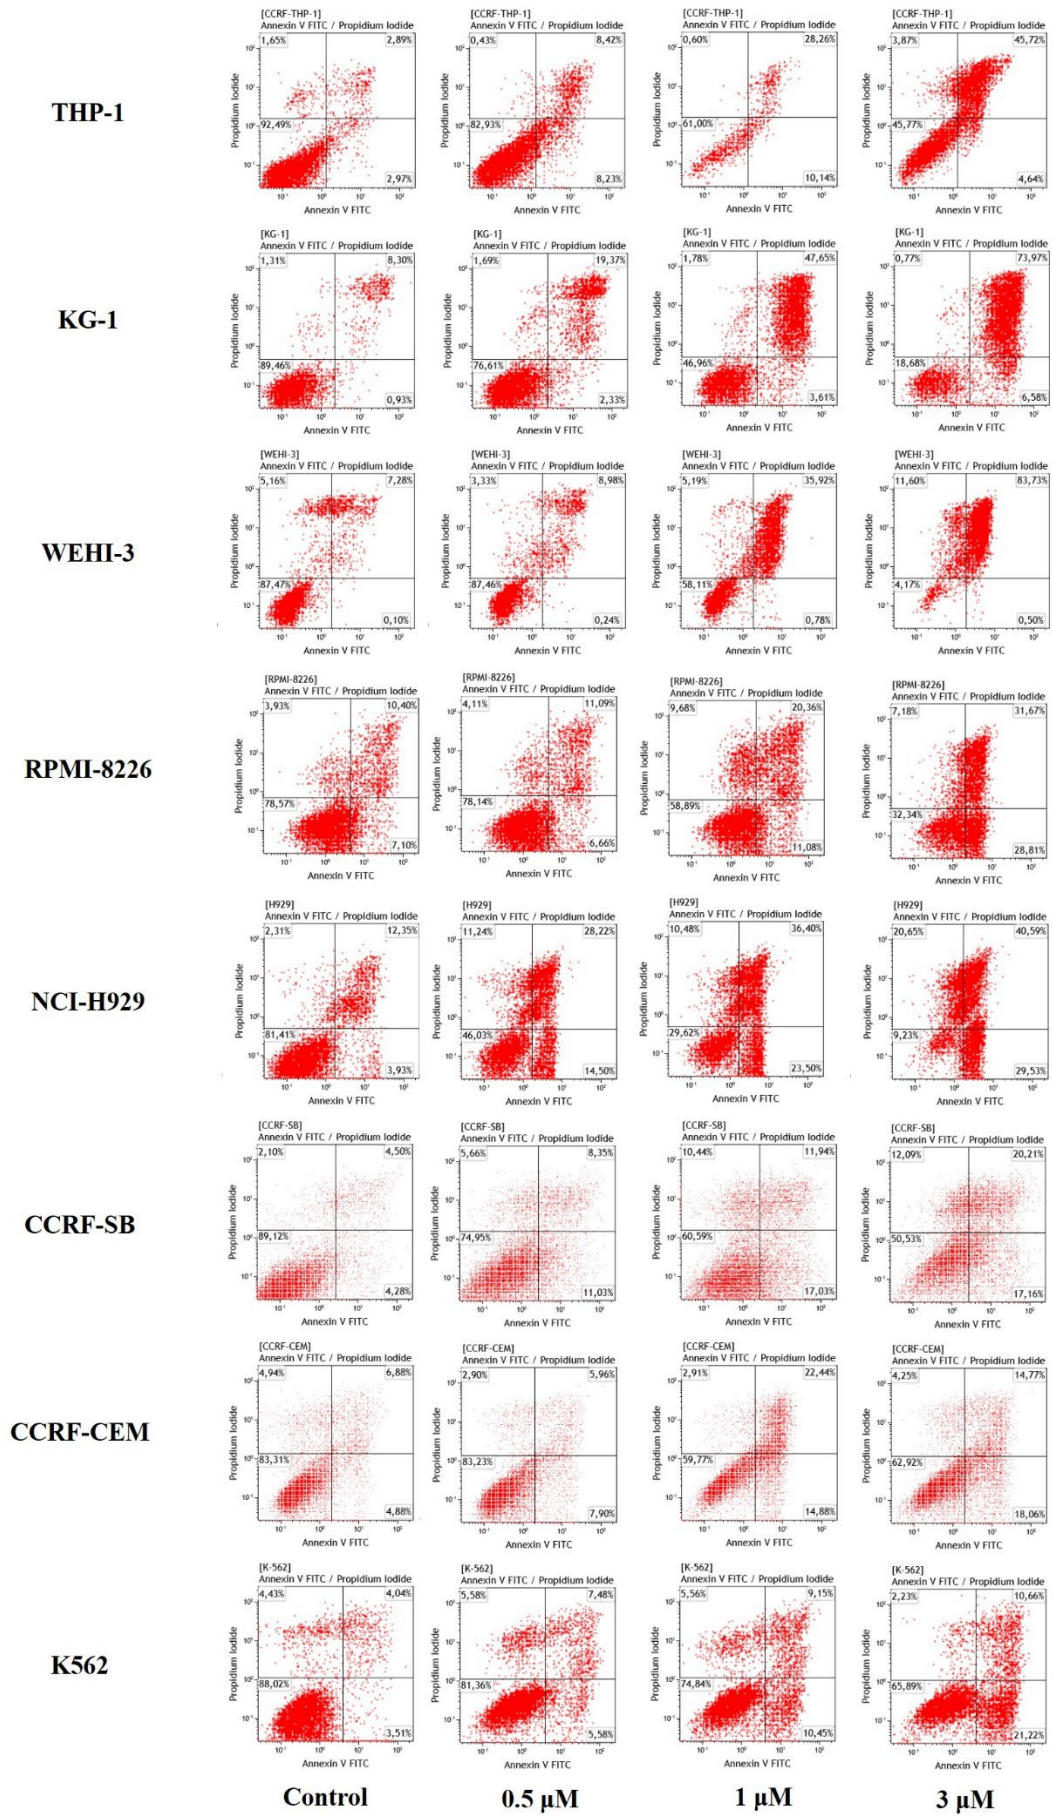

**Figure S3.** An example of the CBL0137's effect on the activation of apoptosis in in hematologic malignancies cultures
